# Supplementary material for: Serious Mental Illness Diagnosis and COVID-19 Vaccine Uptake in the Veterans Health Administration
Source: Atypon-hosted journal article supplement (doi:10.1176/appi.ps.202100499), 2022-01-19
Supplement: appi.ps.202100499.ds001.pdf [file appi.ps.202100499.ds001.pdf]

## ICD-10 Serious Mental Illness Diagnoses

| ICD 10 code | ICD 10 Description                                                               |
|-------------|----------------------------------------------------------------------------------|
| F06.0       | Psychotic disorder with hallucinations due to known physiological condition      |
| F06.2       | Psychotic disorder with delusions due to known physiological condition           |
| F20.0       | Paranoid schizophrenia                                                           |
| F20.1       | Disorganized schizophrenia                                                       |
| F20.2       | Catatonic schizophrenia                                                          |
| F20.3       | Undifferentiated schizophrenia                                                   |
| F20.5       | Residual schizophrenia                                                           |
| F20.81      | Schizophreniform disorder                                                        |
| F20.89      | Other schizophrenia                                                              |
| F20.9       | Schizophrenia, unspecified                                                       |
| F22.        | Delusional disorders                                                             |
| F23.        | Brief psychotic disorder                                                         |
| F24.        | Shared psychotic disorder                                                        |
| F25.0       | Schizoaffective disorder, bipolar type                                           |
| F25.1       | Schizoaffective disorder, depressive type                                        |
| F25.8       | Other schizoaffective disorders                                                  |
| F25.9       | Schizoaffective disorder, unspecified                                            |
| F28.        | Other psychotic disorder not due to a substance or known physiological condition |
| F29.        | Unspecified psychosis not due to a substance or known physiological condition    |
| F30.10      | Manic episode without psychotic symptoms, unspecified                            |
| F30.11      | Manic episode without psychotic symptoms, mild                                   |
| F30.12      | Manic episode without psychotic symptoms, moderate                               |
| F30.13      | Manic episode, severe, without psychotic symptoms                                |
| F30.2       | Manic episode, severe with psychotic symptoms                                    |
| F30.3       | Manic episode in partial remission                                               |
| F30.4       | Manic episode in full remission                                                  |
| F30.8       | Other manic episodes                                                             |
| F30.9       | Manic episode, unspecified                                                       |

|        |                                                                                     |
|--------|-------------------------------------------------------------------------------------|
| F31.0  | Bipolar disorder, current episode hypomanic                                         |
| F31.10 | Bipolar disorder, current episode manic without psychotic features, unspecified     |
| F31.11 | Bipolar disorder, current episode manic without psychotic features, mild            |
| F31.12 | Bipolar disorder, current episode manic without psychotic features, moderate        |
| F31.13 | Bipolar disorder, current episode manic without psychotic features, severe          |
| F31.2  | Bipolar disorder, current episode manic severe with psychotic features              |
| F31.30 | Bipolar disorder, current episode depressed, mild or moderate severity, unspecified |
| F31.31 | Bipolar disorder, current episode depressed, mild                                   |
| F31.32 | Bipolar disorder, current episode depressed, moderate                               |
| F31.4  | Bipolar disorder, current episode depressed, severe, without psychotic features     |
| F31.5  | Bipolar disorder, current episode depressed, severe, with psychotic features        |
| F31.60 | Bipolar disorder, current episode mixed, unspecified                                |
| F31.61 | Bipolar disorder, current episode mixed, mild                                       |
| F31.62 | Bipolar disorder, current episode mixed, moderate                                   |
| F31.63 | Bipolar disorder, current episode mixed, severe, without psychotic features         |
| F31.64 | Bipolar disorder, current episode mixed, severe, with psychotic features            |
| F31.70 | Bipolar disorder, currently in remission, most recent episode unspecified           |
| F31.71 | Bipolar disorder, in partial remission, most recent episode hypomanic               |
| F31.72 | Bipolar disorder, in full remission, most recent episode hypomanic                  |
| F31.73 | Bipolar disorder, in partial remission, most recent episode manic                   |
| F31.74 | Bipolar disorder, in full remission, most recent episode manic                      |
| F31.75 | Bipolar disorder, in partial remission, most recent episode depressed               |
| F31.76 | Bipolar disorder, in full remission, most recent episode depressed                  |
| F31.77 | Bipolar disorder, in partial remission, most recent episode mixed                   |
| F31.78 | Bipolar disorder, in full remission, most recent episode mixed                      |
| F31.81 | Bipolar II disorder                                                                 |
| F31.89 | Other bipolar disorder                                                              |
| F31.9  | Bipolar disorder, unspecified                                                       |
| F53.   | Puerperal psychosis                                                                 |
| F53.0  | Postpartum depression                                                               |

|       |                     |
|-------|---------------------|
| F53.1 | Puerperal psychosis |
|-------|---------------------|

## Serious Mental Illness ICD-10 Diagnosis Categories

|                                                                                                | <b>N</b> | <b>%</b> |
|------------------------------------------------------------------------------------------------|----------|----------|
| <b>Total</b>                                                                                   | 197,491  | 100.0    |
| <b>Psychotic Disorder Due to Known Physiological Condition (F06.x)</b>                         | 2,878    | 1.5      |
| <b>Schizophrenia (F20.x)</b>                                                                   | 45,485   | 23.0     |
| <b>Delusional Disorder (F22.)</b>                                                              | 7,774    | 3.9      |
| <b>Brief Psychotic Disorder (F23.)</b>                                                         | 2,923    | 1.5      |
| <b>Shared Psychotic Disorder (F24.)</b>                                                        | 229      | 0.1      |
| <b>Schizoaffective disorder (F25.x)</b>                                                        | 37,747   | 19.1     |
| <b>Other psychotic disorder not due to a substance or known physiological condition (F28.)</b> | 6,340    | 3.2      |
| <b>Unspecified psychosis not due to a substance or known physiological condition (F29.)</b>    | 22,709   | 11.5     |
| <b>Manic Episode (F30.x)</b>                                                                   | 1,684    | 0.9      |
| <b>Bipolar Disorder (F31.x)</b>                                                                | 123,753  | 62.7     |
| <b>Mental and behavioral disorders associated with puerperium (F53.x)</b>                      | 513      | 0.3      |

## Patient Characteristics by Serious Mental Illness (SMI) Diagnosis

|                                        | Serious Mental Illness (SMI) |       |         |       |           |       | Chi2(1)  | P-value |
|----------------------------------------|------------------------------|-------|---------|-------|-----------|-------|----------|---------|
|                                        | No SMI                       |       | SMI     |       | Total     |       |          |         |
|                                        | No.                          | %     | No.     | %     | No.       | %     |          |         |
| <b>Received COVID-19 Vaccine</b>       |                              |       |         |       |           |       |          |         |
| No                                     | 2,526,698                    | 53.8  | 102,410 | 51.9  | 2,629,108 | 53.8  | 299.45   | 0.00    |
| Yes                                    | 2,166,504                    | 46.2  | 95,081  | 48.1  | 2,261,585 | 46.2  |          |         |
| Total                                  | 4,693,202                    | 100.0 | 197,491 | 100.0 | 4,890,693 | 100.0 |          |         |
| <b>Race/Ethnicity</b>                  |                              |       |         |       |           |       |          |         |
| Native American/Alaska Native          | 32,640                       | 0.7   | 1,501   | 0.8   | 34,141    | 0.7   | 7150.13  | 0.00    |
| Asian                                  | 56,681                       | 1.2   | 1,867   | 0.9   | 58,548    | 1.2   |          |         |
| Black                                  | 853,915                      | 18.2  | 49,487  | 25.1  | 903,402   | 18.5  |          |         |
| Multi                                  | 40,167                       | 0.9   | 2,475   | 1.3   | 42,642    | 0.9   |          |         |
| Native Hawaiian/Other Pacific Islander | 36,892                       | 0.8   | 1,472   | 0.7   | 38,364    | 0.8   |          |         |
| White                                  | 3,334,393                    | 71.0  | 124,764 | 63.2  | 3,459,157 | 70.7  |          |         |
| Hispanic                               | 338,514                      | 7.2   | 15,925  | 8.1   | 354,439   | 7.2   |          |         |
| Total                                  | 4,693,202                    | 100.0 | 197,491 | 100.0 | 4,890,693 | 100.0 |          |         |
| <b>Gender</b>                          |                              |       |         |       |           |       |          |         |
| Male                                   | 4,268,756                    | 91.0  | 164,559 | 83.3  | 4,433,315 | 90.6  | 13019.22 | 0.00    |
| Female                                 | 424,446                      | 9.0   | 32,932  | 16.7  | 457,378   | 9.4   |          |         |
| Total                                  | 4,693,202                    | 100.0 | 197,491 | 100.0 | 4,890,693 | 100.0 |          |         |
| <b>Marital Status</b>                  |                              |       |         |       |           |       |          |         |
| Divorced/Separated                     | 1,157,817                    | 24.7  | 73,125  | 37.0  | 1,230,942 | 25.2  | 55391.33 | 0.00    |
| Married/Widowed                        | 2,899,077                    | 61.8  | 71,490  | 36.2  | 2,970,567 | 60.7  |          |         |
| Single/Never Married                   | 636,308                      | 13.6  | 52,876  | 26.8  | 689,184   | 14.1  |          |         |
| Total                                  | 4,693,202                    | 100.0 | 197,491 | 100.0 | 4,890,693 | 100.0 |          |         |
| <b>Health Insurance</b>                |                              |       |         |       |           |       |          |         |
| No Health Insurance                    | 1,504,185                    | 32.1  | 87,016  | 44.1  | 1,591,201 | 32.5  | 12454.70 | 0.00    |
| Health Insurance                       | 3,189,017                    | 67.9  | 110,475 | 55.9  | 3,299,492 | 67.5  |          |         |
| Total                                  | 4,693,202                    | 100.0 | 197,491 | 100.0 | 4,890,693 | 100.0 |          |         |
| <b>Flu Vaccine</b>                     |                              |       |         |       |           |       |          |         |
| No Flu Vaccine                         | 2,505,021                    | 53.4  | 88,096  | 44.6  | 2,593,117 | 53.0  | 5849.09  | 0.00    |
| Flu Vaccine                            | 2,188,181                    | 46.6  | 109,395 | 55.4  | 2,297,576 | 47.0  |          |         |
| Total                                  | 4,693,202                    | 100.0 | 197,491 | 100.0 | 4,890,693 | 100.0 |          |         |
| <b>Smoking Status</b>                  |                              |       |         |       |           |       |          |         |
| Current Smoker                         | 919,779                      | 19.6  | 69,462  | 35.2  | 989,241   | 20.2  | 29078.23 | 0.00    |
| Former Smoker                          | 1,940,367                    | 41.3  | 70,715  | 35.8  | 2,011,082 | 41.1  |          |         |
| Never Smoker                           | 1,833,056                    | 39.1  | 57,314  | 29.0  | 1,890,370 | 38.7  |          |         |
| Total                                  | 4,693,202                    | 100.0 | 197,491 | 100.0 | 4,890,693 | 100.0 |          |         |

|                               |           |       |         |       |           |       |           |      |
|-------------------------------|-----------|-------|---------|-------|-----------|-------|-----------|------|
| <b>CAN Score Group (%ile)</b> |           |       |         |       |           |       |           |      |
| 0 to 24                       | 1,197,634 | 25.5  | 8,733   | 4.4   | 1,206,367 | 24.7  | 124322.89 | 0.00 |
| 25 to 49                      | 1,202,532 | 25.6  | 25,829  | 13.1  | 1,228,361 | 25.1  |           |      |
| 50 to 74                      | 1,189,113 | 25.3  | 53,346  | 27.0  | 1,242,459 | 25.4  |           |      |
| 75+                           | 1,103,923 | 23.5  | 109,583 | 55.5  | 1,213,506 | 24.8  |           |      |
| Total                         | 4,693,202 | 100.0 | 197,491 | 100.0 | 4,890,693 | 100.0 |           |      |
| <b>Depression</b>             |           |       |         |       |           |       |           |      |
| No Depression                 | 3,523,650 | 75.1  | 112,593 | 57.0  | 3,636,243 | 74.4  | 32442.07  | 0.00 |
| Depression                    | 1,169,552 | 24.9  | 84,898  | 43.0  | 1,254,450 | 25.6  |           |      |
| Total                         | 4,693,202 | 100.0 | 197,491 | 100.0 | 4,890,693 | 100.0 |           |      |
| <b>PTSD</b>                   |           |       |         |       |           |       |           |      |
| No PTSD                       | 3,784,122 | 80.6  | 118,796 | 60.2  | 3,902,918 | 79.8  | 49304.03  | 0.00 |
| PTSD                          | 909,080   | 19.4  | 78,695  | 39.8  | 987,775   | 20.2  |           |      |
| Total                         | 4,693,202 | 100.0 | 197,491 | 100.0 | 4,890,693 | 100.0 |           |      |
| <b>Substance Use Disorder</b> |           |       |         |       |           |       |           |      |
| No SUD                        | 4,159,823 | 88.6  | 117,851 | 59.7  | 4,277,674 | 87.5  | 144987.74 | 0.00 |
| SUD                           | 533,379   | 11.4  | 79,640  | 40.3  | 613,019   | 12.5  |           |      |
| Total                         | 4,693,202 | 100.0 | 197,491 | 100.0 | 4,890,693 | 100.0 |           |      |
